# Supplementary material for: Natural ITD statistics predict human auditory spatial perception
Source: eLife journal article supplement (doi:10.7554/elife.51927), 2020-10-12

# A. ITD variability determined by frequency interference within cochlear filters frequency band

Tone or ensemble of two frequencies within or outside the bandwidth of a cochlear filter centered at 500 Hz

- 500 Hz + 723.6 Hz
- 500 Hz + 523.6 Hz
- 500 Hz alone

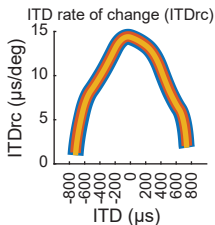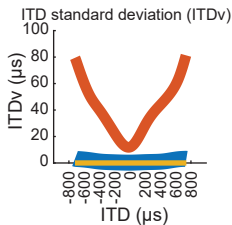

# B. ITD statistics across broadband signals

White noise

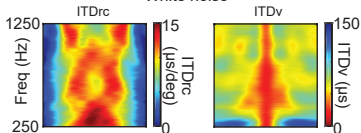

Popular song

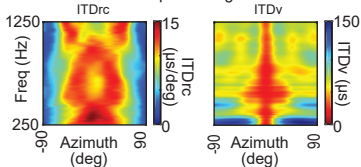

# C. ITD statistics across acoustic environments

Dummy head inside anechoic chamber

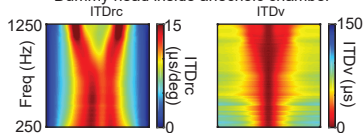

Dummy head on office room

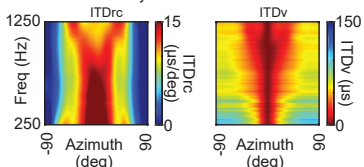

Supplement: supp [file elife-51927-supp-v1.zip]
